# Supplementary material for: CoV-Seq, a New Tool for SARS-CoV-2 Genome Analysis and Visualization: Development and Usability Study
Source: PubMed Central journal article supplement (PMC7537720; doi:10.2196/22299), 2020-10-02
Supplement: jmir_v22i10e22299_app1.pdf [file jmir_v22i10e22299_app1.pdf]

# Supplemental Material for CoV-Seq: SARS-CoV-2 Genome Analysis and Visualization

September 13, 2020

## 1 Supplementary Figures

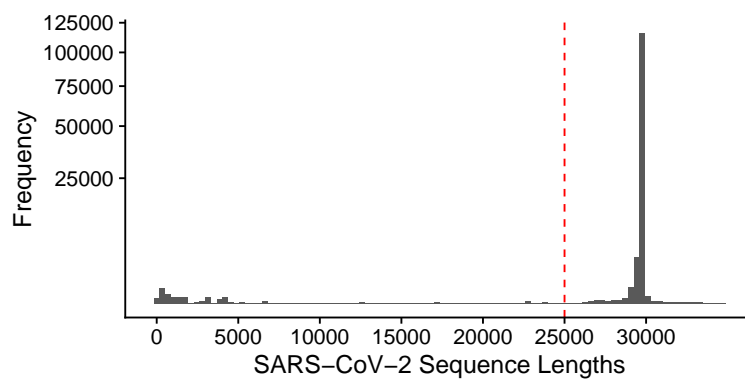

Figure S1: Distribution of SARS-CoV-2 sequence lengths. Sequences with lengths less than 25,000 nucleotides are removed during preprocessing.

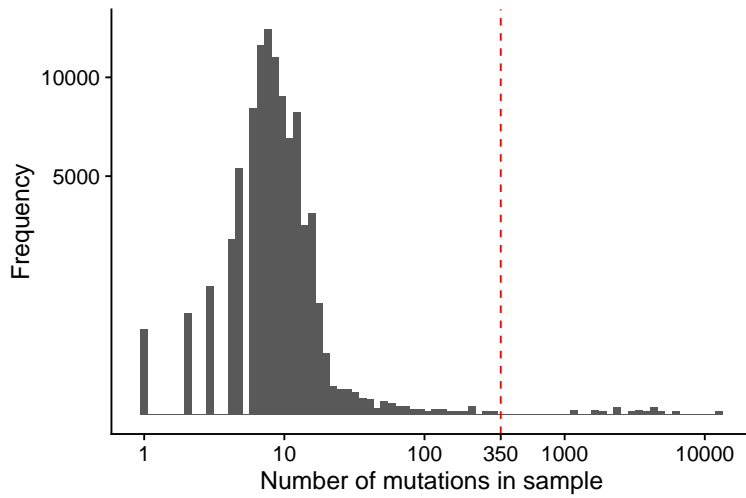

Figure S2: Distribution of sample mutations identified against the reference genome NC\_045512.2. Samples with more than 350 mutations are removed during post-processing.

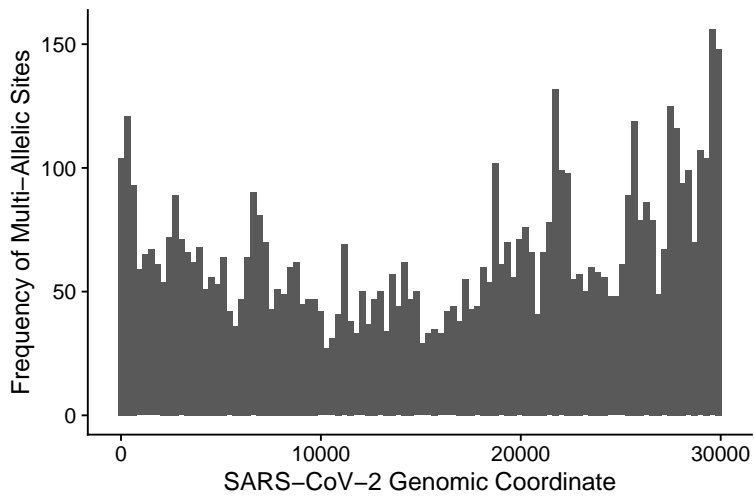

Figure S3: Distribution of multi-allelic sites along the SARS-CoV-2 genome. Multi-allelic sites are more likely to be identified at the beginning and the end of the genome.
